# Supplementary material
Source: PubMed Central journal article supplement (PMC4901354)
Supplement: hdy201622x1.pdf [file hdy201622x1.pdf]

| Mix    | Locus                         | GenBank                                 | Repeat motif                                        | F- and R-primers, 5'-3'                             | Label              | Final conc.        | Range                                     | Original LG <sup>4</sup> |
|--------|-------------------------------|-----------------------------------------|-----------------------------------------------------|-----------------------------------------------------|--------------------|--------------------|-------------------------------------------|--------------------------|
| A      | Bfg023                        | EU334917                                | (AC) <sub>20</sub>                                  | AATTTGGAGATATGGAGGGTT<br>TTGGACGTGCTTGTACC          | HEX                | 0,4 mM<br>0,4 mM   | 103-120                                   | LG7                      |
|        | Bfg183                        | EU335004                                | (TG) <sub>9</sub>                                   | AGCCTGAAATGTGGCAGAAG<br>GTCCCATTAGAAGTCGCTGATT      | FAM                | 0,2 mM<br>0,2 mM   | 109-164                                   | LG7                      |
|        | Bfg145                        | EU334986                                | (TCTA) <sub>29</sub>                                | CAAACCTCAGGCATATTCGTTCA<br>TAGATTTGACAGTGGAGCAGGA   | ATTO550            | 0,5 mM<br>0,5 mM   | 177-216                                   | LG7                      |
|        | Bfg037                        | EU334923                                | (TCT) <sub>25</sub>                                 | CTCTCACTTCTGTTGGGCTAT<br>CTTCGTCCAGTTGGGCAG         | ATTO620            | 0,5 mM<br>0,5 mM   | 224-236                                   | LG7                      |
|        | Bfg059                        | EU334940                                | (ACTC) <sub>8</sub>                                 | ACAAATCGAAGGGAGAATGAAG<br>AATTAGAGCCTGTGTGATGGG     | HEX                | 0,4 mM<br>0,4 mM   | 288-308                                   | LG7                      |
|        | Bfg009                        | EU334910                                | (ATC) <sub>9</sub>                                  | CAACTGCTCCTGATCCTTATCC<br>TCAGTGGTCTCTAGTAATGCCT    | ATTO550            | 0,1 mM<br>0,1 mM   | 311-332                                   | LG7                      |
| B      | Bfg133                        | EU334980                                | (GAGT) <sub>11</sub>                                | TGGCATGAAATGCTGATCCT<br>GGCCCTTGAGGCGATTTA          | ATTO550            | 0,2 mM<br>0,2 mM   | 119-157                                   | LG7                      |
|        | Bfg025                        | EU334918                                | (GA) <sub>11</sub>                                  | CGTAACATAACCGATAACAC<br>ACGATGTCCTGATGTAGAC         | FAM                | 0,5 mM<br>0,5 mM   | 187-189                                   | LG7                      |
|        | Bfg204                        | EU335012                                | (TCTT) <sub>4</sub> (TCTT) <sub>7</sub>             | AGAAAGTCCCCTAACAGTGCAG<br>AGGAATACACATGCCTCCCTTA    | HEX                | 0,3 mM<br>0,3 mM   | 208-326                                   | LG7                      |
|        | Bfg237                        | EU335030                                | (GATA) <sub>19</sub>                                | GGATTCTACGGATCTTTGGACA<br>CCTTCCATTCTGTTTGTAGGC     | ATTO620            | 0,6 mM<br>0,6 mM   | 214-277                                   | LG7                      |
|        | Bfg165                        | EU334997                                | (TG) <sub>38</sub>                                  | GCGTGTGGGTAGAAGGAATAG<br>ATAAAAGCAATGGGTATGCAC      | FAM                | 0,2 mM<br>0,2 mM   | 243-338                                   | LG7                      |
|        | Bfg028                        | EU334919                                | (CT) <sub>8</sub>                                   | GCTCCCATTCTTCTCTCTTTC<br>TAAACACCTTGCGGAGTAAAGC     | ATTO550            | 0,1 mM<br>0,1 mM   | 272-278                                   | LG7                      |
|        | <b>Rt2Ca2-22</b> <sup>3</sup> | AF447865                                | (AC) <sub>10</sub>                                  | CGCCTTACAAGAGGTGGAG<br>AGACTCCCTTACAGGCATGG         | FAM                | 0,1 mM<br>0,1 mM   | 88-118                                    | LG7                      |
| C      | Bfg076                        | EU334949                                | (GATA) <sub>22</sub>                                | CGTAAAGGACAGATGATAGATGGA<br>GAGCCATAGAAGGAACATGAC   | ATTO620            | 0,25 mM<br>0,25 mM | 134-177                                   | LG3                      |
|        | <b>Bfg135</b> <sup>1</sup>    | EU334982                                | (ATCT) <sub>19</sub>                                | CAGAGAACCCTTAGAAACCTCTTG<br>CAAAACTCAAAGCTACTGTCCGG | ATTO620            | 0,25 mM<br>0,25 mM | <b>212-264 /<br/>339-400</b> <sup>1</sup> | LG9                      |
|        | Bfg161                        | EU334996                                | (AGAA) <sub>15</sub>                                | TCTCCAATGAACAGGAAGCAC<br>GCAGCAACAACCTGATTAGAAA     | FAM                | 0,1 mM<br>0,1 mM   | 176-228                                   | LG6                      |
|        | Bfg063                        | EU33494                                 | (TTCA) <sub>7</sub>                                 | GGAAAGAAAATCGCTCCATCTA<br>TTGGGTTTGATAGCCTCTTGT     | ATTO550            | 0,1 mM<br>0,1 mM   | 90-159                                    | LG13                     |
|        | Bfg074                        | EU334948                                | (GATA) <sub>15</sub>                                | GGGAGGTTAAAGACGTGGCTTA<br>ACAGGCGGGAATCTGTGTT       | ATTO550            | 0,25 mM<br>0,25 mM | 220-337                                   | LG4                      |
|        | Bfg213                        | EU335017                                | (GT) <sub>7</sub> (GT) <sub>5</sub>                 | TTTTAGGAGTCGCCATCAGT<br>CACACTTACCCTCAGCCTCTC       | HEX                | 0,1 mM<br>0,1 mM   | 132-136                                   | LG10                     |
| Bfg095 | EU334959                      | (GT) <sub>14</sub>                      | GTATATGTGCAGAAGCGGTC<br>ATCATTCCAAAACGGGTTCA        | HEX                                                 | 0,25 mM<br>0,25 mM | 228-253            | LG14                                      |                          |
| D      | Bfg008                        | EU334909                                | (AC) <sub>9</sub>                                   | ACGTAGTTCCCTTTTGCACC<br>ACAAGCATGAGGTGTGATTGC       | ATTO620            | 0,35 mM<br>0,35 mM | 157-166                                   | LG8                      |
|        | <b>Rtemp10</b> <sup>2</sup>   | AF297981                                | (GT) <sub>23</sub>                                  | ACAATCTTTATGTGAGGAAGC<br>TTCTCAAGACTGACAAAGG        | FAM                | 0,3 mM<br>0,3 mM   | 80-103                                    | LG9                      |
|        | Bfg218                        | EU335020                                | (ATC) <sub>13</sub> (ATC) <sub>4</sub>              | TCAATGGAGCCCGGAGAT<br>CAGGTAGACTGCACAGGAGGAT        | FAM                | 0,25 mM<br>0,25 mM | 159-224                                   | LG1                      |
|        | Bfg099                        | EU334962                                | (ACTC) <sub>14</sub>                                | CAGTAAGGAATGGATACTAAGC<br>TCCAGTGTAGCATAACAGAGT     | ATTO550            | 0,1 mM<br>0,1 mM   | 103-163                                   | LG9                      |
|        | Bfg253                        | EU335040                                | (CCTT) <sub>13</sub>                                | CATGGTAAAAATGGAGAAGGGAC<br>TGCCAGGGTCTAAAGCTCC      | ATTO550            | 0,1 mM<br>0,1 mM   | 209-264                                   | LG1                      |
|        | Bfg006                        | EU334908                                | (TCT) <sub>20</sub>                                 | TGCTTTCTCCTCTATCAGCAT<br>GCCTTTGACAGACCTTTTA        | HEX                | 0,2 mM<br>0,2 mM   | 140-154                                   | LG6                      |
| Bfg215 | EU335019                      | (CATT) <sub>3</sub> (CATT) <sub>3</sub> | GAAAACCACCTGACCTTTAGAA<br>CCAGCTATCGCACCTTTT        | HEX                                                 | 0,3 mM<br>0,3 mM   | 192-221            | LG12                                      |                          |
| E      | Bfg097                        | EU334961                                | (TC) <sub>23</sub>                                  | TCCTAGTTGAGCCTTCAGACA<br>ACTAAGCTATTCTATGGGGAAGT    | ATTO620            | 0,35 mM<br>0,35 mM | 205-229                                   | LG6                      |
|        | Bfg130                        | EU334978                                | (TCTT) <sub>15</sub>                                | GCAGTTTATAGAGGTGGGG<br>ATATCTCCATCCGGTCCA           | FAM                | 0,1 mM<br>0,1 mM   | 133-176                                   | LG12                     |
|        | Bfg051                        | EU334933                                | (GAT) <sub>9</sub>                                  | ACTGGTTAGATTGGGCGG<br>TGGCGACAAAGGAATTAGAGTT        | FAM                | 0,2 mM<br>0,2 mM   | 201-276                                   | LG4                      |
|        | Bfg111                        | EU334966                                | (AG) <sub>21</sub>                                  | GCCATGTGAGAGAGATTCCAG<br>GAGGTTCCCTTTCAGTCTCCTT     | ATTO550            | 0,25 mM<br>0,25 mM | 115-151                                   | LG1                      |
|        | Bfg060                        | EU334941                                | (CT) <sub>23</sub>                                  | AAGGACTGGGATATGCTGAAAA<br>CCACTGCAATAGGACATTGAAA    | ATTO550            | 0,1 mM<br>0,1 mM   | 213-245                                   | LG5                      |
|        | Bfg064                        | EU334943                                | (AC) <sub>29</sub>                                  | CTTGCTGGGTACATTTGATTTA<br>TACACACATTCTCGGCTGCTAT    | HEX                | 0,2 mM<br>0,2 mM   | 180-215                                   | LG3                      |
| Bfg244 | EU335035                      | (AG) <sub>10</sub> (AG) <sub>14</sub>   | GTGCTGAAAATTGACGTAGCAA<br>CCTCATTTGTCGGAGTATATGAACA | HEX                                                 | 0,4 mM<br>0,4 mM   | 339-388            | LG1                                       |                          |

|   |        |          |                                          |                                                    |         |                    |         |      |
|---|--------|----------|------------------------------------------|----------------------------------------------------|---------|--------------------|---------|------|
| F | Bfg221 | EU335022 | (TGAC) <sub>6</sub>                      | GGACATTTTCTTTGGCTCAACT<br>TGCCCTCACAACCCACTACATAC  | ATTO620 | 0,3 mM<br>0,3 mM   | 143-162 | LG4  |
|   | Bfg003 | EU334905 | (GA) <sub>19</sub> (AG) <sub>8</sub>     | CCCACAAATTAACACACAGGA<br>CCTCCCTCCCCTTATCTCTCTA    | ATTO620 | 0,3 mM<br>0,3 mM   | 230-273 | LG10 |
|   | Bfg122 | EU334972 | (CA) <sub>14</sub>                       | GCCATTTGTATCCAGTTTCCTC<br>CGAAGATGTCTGCTTGTCTGTT   | FAM     | 0,2 mM<br>0,2 mM   | 189-210 | LG10 |
|   | Bfg112 | EU334967 | (AC) <sub>21</sub>                       | ATGAACAAGGACTTTCAAGGCA<br>GGGTATAGGACTGTGGATGTGG   | ATTO550 | 0,1 mM<br>0,1 mM   | 151-183 | LG8  |
|   | Bfg250 | EU335038 | (GATA) <sub>20</sub>                     | CCTGTTAGAGAAGCCGATCATT<br>TTGGACTGGAAGTATTGGGAGT   | ATTO550 | 0,1 mM<br>0,1 mM   | 244-304 | LG14 |
|   | Bfg057 | EU334938 | (TGAG) <sub>10</sub>                     | AAGGACTTTGCTCGCTTTGTAA<br>GGCGATTAAGTTCGCATTTGT    | HEX     | 0,3 mM<br>0,3 mM   | 117-134 | LG3  |
|   | Bfg124 | EU334973 | (TCAT) <sub>11</sub>                     | TCAGCTTGGTTGTCAGTTTGT<br>GCATTAGCATTATCTCGGGAAC    | HEX     | 0,1 mM<br>0,1 mM   | 301-391 | LG9  |
| G | Bfg238 | EU335031 | (TGAG) <sub>4</sub>                      | TGTTGATCCTTTTGCCTACCT<br>AAAACCCACCTAATCTGAAGGC    | ATTO620 | 0,25 mM<br>0,25 mM | 177-185 | LG11 |
|   | Bfg048 | EU334931 | (ACT) <sub>8</sub>                       | GCCCACCACAACCTACCCTACT<br>CCAGGTTGAAGGCAATTTTGTGTA | ATTO620 | 0,3 mM<br>0,3 mM   | 347-363 | LG13 |
|   | Bfg232 | EU335027 | (AAGA) <sub>32</sub>                     | ACCCTGCACTTGACTATGTAA<br>CAATCAACCGTGTATAGAAGAG    | FAM     | 0,2 mM<br>0,2 mM   | 275-310 | LG14 |
|   | Bfg195 | EU335007 | (GT) <sub>16</sub>                       | CTGACTATTTGTGTGCCTCGAA<br>TTTTCCAGTGTGGTTTCATACG   | FAM     | 0,4 mM<br>0,4 mM   | 109-126 | LG3  |
|   | Bfg203 | EU335011 | (TTCT) <sub>23</sub> (TTCT) <sub>4</sub> | ATATCTTCCCTTTCCCTTTCA<br>GCAACAGAGCAGACAGAGAGAG    | ATTO550 | 0,1 mM<br>0,1 mM   | 183-242 | LG11 |
|   | Bfg055 | EU334937 | (AGTG) <sub>4</sub>                      | TTAGGGCCGGTTCATACAATAC<br>GTTTGCATTTGTTGCGCTATAC   | HEX     | 0,1 mM<br>0,1 mM   | 127-140 | LG5  |
|   | Bfg046 | EU334929 | (TG) <sub>29</sub>                       | GGAGCATTGGAAGAACAACAAT<br>GTTTGCGTAGGTAGGCCATGT    | HEX     | 0,2 mM<br>0,2 mM   | 201-273 | LG8  |
