# Supplementary material
Source: PubMed Central journal article supplement (PMC4901354)
Supplement: hdy201622x2.pdf [file hdy201622x2.pdf]

|        |            | Ammarnäs       |                |                |                |                |                |                |                |                |                | Tvedöra        |                |                |                |                |                |                |                |                |                |                |                |                |                |
|--------|------------|----------------|----------------|----------------|----------------|----------------|----------------|----------------|----------------|----------------|----------------|----------------|----------------|----------------|----------------|----------------|----------------|----------------|----------------|----------------|----------------|----------------|----------------|----------------|----------------|
|        |            | A1             |                | A2             |                | A3             |                | A4             |                | A5             |                | A6             |                | T1             |                | T2             |                | T3             |                | T4             |                | T5             |                | T6             |                |
|        |            | p <sub>r</sub> | φ <sup>2</sup> |
| Xt1    | Bfg147     | 5E-10          | 0.91           | 2E-06          | 1              | 1E-10          | 1              | 2E-11          | 1              | 7E-12          | 0.92           | 1              | 1              | 0.3636         | 0.24           | 1              | 0.18           | 0.3429         | 0.58           | NA             | NA             | 1E-05          | 1              | 0.0476         | 1              |
|        | Rtemp5     | 2E-10          | 0.91           | 2E-06          | 1              | 2E-10          | 1              | 2E-11          | 1              | 7E-12          | 0.92           | 1              | 1              | 0.3636         | 0.24           | 1              | 0.02           | 0.0791         | 0.58           | 0.0792         | 0.23           | 1E-05          | 1              | 0.0667         | 1              |
|        | RtSB03     | 2E-10          | 0.91           | 2E-06          | 1              | 2E-10          | 1              | 2E-11          | 1              | 7E-12          | 0.92           | 1              | 1              | NA             | NA             | 1              | 0.02           | NA             | NA             | 0.0792         | 0.23           | 1E-05          | 1              | 0.0476         | 1              |
|        | Bfg021     | NA             |
|        | Bfg072     | 6E-06          | 1              | 2E-06          | 1              | NA             | NA             | 3E-06          | 1              | 7E-12          | 0.92           | 1              | 1              | 0.3636         | 0.24           | 1              | 0.02           | 0.0791         | 0.58           | 0.0792         | 0.23           | 1E-05          | 1              | 0.0667         | 1              |
|        | Bfg266     | 3E-10          | 0.91           | 2E-06          | 1              | 5E-10          | 1              | 1E-11          | 1              | 7E-12          | 0.92           | 1              | 1              | 0.3636         | 0.24           | 1              | 0.02           | 0.0791         | 0.58           | 0.2545         | 0.22           | 1E-05          | 1              | 0.0476         | 1              |
|        | RtuB       | 6E-05          | 0.82           | 2E-06          | 1              | 5E-10          | 1              | 1E-11          | 1              | 7E-12          | 0.92           | 1              | 1              | 0.3636         | 0.24           | 1              | 0.02           | NA             | NA             | 0.2176         | 0.17           | 1E-05          | 1              | 0.0476         | 1              |
|        | Bfg093     | 2E-10          | 0.91           | 2E-06          | 1              | 5E-10          | 1              | 1E-11          | 1              | NA             | NA             | 1              | 1              | 0.3636         | 0.24           | 1              | 0.02           | 0.0791         | 0.58           | NA             | NA             | NA             | NA             | NA             | NA             |
|        | Bfg191     | 2E-10          | 0.91           | 2E-06          | 1              | 2E-10          | 1              | 1E-11          | 1              | 7E-12          | 0.92           | 1              | 1              | 0.3636         | 0.24           | 1              | 0.02           | 0.0791         | 0.58           | 0.0792         | 0.23           | 1E-05          | 1              | 0.0667         | 1              |
|        | Bfg053     | 2E-10          | 0.91           | 2E-06          | 1              | 5E-10          | 1              | 1E-11          | 1              | 7E-12          | 0.92           | 1              | 1              | 0.3636         | 0.24           | 1              | 0.02           | 0.0791         | 0.58           | 0.2545         | 0.22           | 1E-05          | 1              | 0.0476         | 1              |
|        | Bfg172     | NA             | NA             | 2E-06          | 1              | 5E-10          | 1              | NA             | NA             | 7E-12          | 0.92           | 1              | 1              | 0.3636         | 0.24           | 1              | 0.02           | 0.0791         | 0.58           | 0.1697         | 0.2            | 1E-05          | 1              | 0.0476         | 1              |
|        | Bfg131     | NA             | NA             | 2E-06          | 1              | 2E-10          | 1              | NA             | NA             | 7E-12          | 0.92           | 1              | 1              | 0.3636         | 0.24           | 1              | 0.02           | 0.0791         | 0.58           | 0.0792         | 0.23           | 1E-05          | 1              | NA             | NA             |
| Bfg092 | NA         | NA             | 2E-06          | 1              | 5E-10          | 1              | 1E-11          | 1              | 7E-12          | 0.92           | 1              | 1              | NA             | NA             | NA             | NA             | 0.2637         | 0.6            | 0.1273         | 0.22           | 8E-05          | 1              | 0.1667         | 1              |                |
| Xt2    | Bfg133     | NA             | NA             | 0.0002         | 1              | 2E-08          | 1              | 2E-11          | 1              | 6E-05          | 0.82           | NA             | 0.4762         | 0.26           |
|        | Rt2-Ca2-22 | 3E-10          | 0.91           | 2E-06          | 1              | 1E-10          | 1              | 2E-11          | 1              | 1E-11          | 0.91           | 1              | 1              | NA             | NA             | 1              | 0.02           | 0.4945         | 0.11           | 0.1086         | 0.25           | 0.3695         | 0.05           | NA             | NA             |
|        | Bfg237     | 3E-10          | 0.91           | 2E-06          | 1              | 1E-10          | 1              | 1E-11          | 1              | 7E-12          | 0.92           | 1              | 1              | 0.4545         | 0.13           | 1              | 0.02           | 0.4945         | 0.11           | 0.1086         | 0.25           | 0.3695         | 0.05           | NA             | NA             |
|        | Bfg025     | NA             | 0.1086         | 0.25           | NA             | NA             | 0.4762         | 0.26           |                |
|        | Bfg204     | 3E-10          | 0.91           | 2E-06          | 1              | NA             | NA             | 1E-11          | 1              | 1E-11          | 0.91           | 1              | 1              | 0.5455         | 0.09           | 1              | 0.02           | 0.4945         | 0.11           | 0.1086         | 0.25           | 0.3695         | 0.05           | 0.4762         | 0.26           |
|        | Bfg165     | 3E-10          | 0.91           | 2E-06          | 1              | 1E-10          | 1              | 1E-11          | 1              | 1E-11          | 0.91           | 1              | 1              | 0.5455         | 0.09           | 1              | 0.02           | 0.4945         | 0.11           | 0.1086         | 0.25           | 0.3695         | 0.05           | 0.4762         | 0.26           |
|        | Bfg183     | 2E-10          | 0.91           | 2E-06          | 1              | 2E-05          | 1              | NA             | NA             | 7E-12          | 0.92           | 1              | 1              | 0.5455         | 0.09           | 1              | 0.02           | 0.4945         | 0.24           | 0.1086         | 0.25           | 0.3801         | 0.09           | 0.4762         | 0.26           |
|        | Bfg037     | NA             | NA             | 2E-06          | 1              | 1E-10          | 1              | NA             | NA             | 7E-12          | 0.92           | NA             | NA             | 0.5455         | 0.09           | NA             | NA             | NA             | NA             | 0.0294         | 0.44           | NA             | NA             | 0.4762         | 0.26           |
|        | Bfg023     | NA             | 0.3801         | 0.09           | NA             | NA             |
|        | Bfg145     | 2E-10          | 0.91           | 2E-06          | 1              | 1E-10          | 1              | 1E-11          | 1              | 7E-12          | 0.92           | 1              | 1              | NA             | NA             | NA             | NA             | 0.4945         | 0.24           | 0.1282         | 0.28           | 0.3801         | 0.09           | NA             | NA             |
|        | Bfg028     | NA             | 0.4762         | 0.26           |
|        | Bfg009     | 2E-10          | 0.91           | 2E-06          | 1              | 1E-10          | 1              | 1E-11          | 1              | 7E-12          | 0.92           | 1              | 1              | NA             | NA             | NA             | NA             | 0.4945         | 0.11           | 0.0513         | 0.47           | 0.3801         | 0.09           | 0.4762         | 0.26           |
| Bfg059 | 0.0002     | 1              | NA             | NA             | 3E-06          | 1              | NA             | NA             | NA             | NA             | 1              | 1              | 0.5455         | 0.09           | NA             | NA             | NA             | NA             | NA             | NA             | 0.3695         | 0.05           | 0.6667         | 0              |                |
| Bfg095 |            |                |                |                |                |                |                |                | NA             | NA             |                |                | 0.5455         | 0.09           | 1              | 0.02           | 0.3818         | 0.19           | 0.0294         | 0.44           | 0.3423         | 0.03           | 0.4762         | 0.26           |                |

|         |          |  |  |  |        |        |      |        |        |      |      |        |        |        |        |        |        |        |        |      |    |
|---------|----------|--|--|--|--------|--------|------|--------|--------|------|------|--------|--------|--------|--------|--------|--------|--------|--------|------|----|
| Xt3     | Bfg074   |  |  |  |        | 0.0252 | 0.11 |        | 0.5455 | 0.09 | NA   | NA     | 0.1231 | 0.22   | NA     | NA     | 0.2567 | 0.11   | NA     | NA   |    |
|         | Bfg253   |  |  |  |        | 0.0188 | 0.12 |        | NA     | NA   | 1    | 0.02   | 0.4308 | 0.02   | 0.1814 | 0.1    | 0.2567 | 0.11   | 1      | 1    |    |
|         | Bfg008   |  |  |  |        | NA     | NA   |        | 0.5455 | 0.09 | 1    | 0.02   | 0.4308 | 0.02   | NA     | NA     | 0.2567 | 0.11   | NA     | NA   |    |
|         | Bfg244   |  |  |  |        | NA     | NA   |        | 0.5455 | 0.09 | 1    | 0.02   | 0.4308 | 0.02   | NA     | NA     | 0.2567 | 0.11   | 1      | 1    |    |
|         | Bfg112   |  |  |  |        | NA     | NA   |        | NA     | NA   | 1    | 0.02   | 0.4308 | 0.02   | 0.1814 | 0.1    | NA     | NA     | NA     | NA   |    |
|         | Bfg046   |  |  |  |        | NA     | NA   |        | 0.5455 | 0.09 | 1    | 0.02   | 0.4308 | 0.02   | 0.1935 | 0.09   | 0.2567 | 0.11   | NA     | NA   |    |
| Xt4A    | Bfg213   |  |  |  |        | 0.0755 | 0.06 |        | 0.3636 | 0.24 | 1    | 0.18   | NA     | NA     | 0.1536 | 0.12   | NA     | NA     | 0.2857 | 0.71 |    |
|         | Bfg122   |  |  |  |        | 0.0969 | 0.04 |        | NA     | NA   | 1    | 0.18   | 0.4747 | 0.04   | 0.1536 | 0.12   | 0.2    | 0.07   | 0.2857 | 0.71 |    |
|         | Bfg003   |  |  |  |        | NA     | NA   |        | 0.3636 | 0.24 | 1    | 0.18   | 0.3692 | 0.04   | 0.3916 | 0.04   | NA     | NA     | 0.4762 | 0.26 |    |
| Xt4B    | Bfg055   |  |  |  | 0.1247 | 0.04   |      | NA     | NA     | 1    | 0.51 | NA     | NA   |    |
| Xt5     | Bfg064   |  |  |  |        | 0.2315 | 0.01 |        | 0.9091 | 0.67 | 1    | 0.02   | 0.4945 | 0.11   | 0.3695 | 0.05   | 0.017  | 0.43   | 0.1429 | 0.54 |    |
|         | Bfg076   |  |  |  |        | 0.2315 | 0.01 |        | 0.9091 | 0.67 | 1    | 0.02   | 0.4945 | 0.11   | NA     | NA     | 0.017  | 0.43   | 0.1429 | 0.54 |    |
|         | Bfg215   |  |  |  |        | NA     | NA   |        | 0.9091 | 0.67 | 1    | 0.02   | NA     | NA     | 0.3359 | 0.02   | 0.017  | 0.43   | 0.1429 | 0.54 |    |
|         | Bfg057   |  |  |  |        | NA     | NA   |        | 0.8182 | 0.42 | 1    | 0.02   | 0.4945 | 0.11   | 0.3695 | 0.05   | 0.0294 | 0.44   | NA     | NA   |    |
|         | Bfg111   |  |  |  |        | 0.3078 | 0.02 |        | 0.9091 | 0.67 | 1    | 0.02   | NA     | NA     | NA     | NA     | 0.017  | 0.43   | 0.1429 | 0.54 |    |
|         | Bfg221   |  |  |  |        | 0.2315 | 0.01 |        | 0.9091 | 0.67 | 1    | 0.02   | NA     | NA     | 0.3359 | 0.02   | 0.017  | 0.43   | 0.1429 | 0.54 |    |
|         | Bfg195   |  |  |  |        | NA     | NA   |        | 0.8889 | 0.61 | 1    | 0      | 0.4945 | 0.11   | NA     | NA     | NA     | NA     | 0.2    | 0.5  |    |
| Xt6     | RTemp10  |  |  |  |        | 0.2212 | 0.03 |        | NA     | NA   | 1    | 0.18   | NA     | NA     | NA     | NA     | 0.3501 | 0      | 0.5714 | 0.03 |    |
|         | Bfg135   |  |  |  |        | 0.1782 | 0.01 |        | NA     | NA   | 1    | 0.18   | 0.4747 | 0.04   | 0.2419 | 0.05   | 0.3501 | 0      | 0.5714 | 0.03 |    |
|         | Bfg099   |  |  |  |        | NA     | NA   |        | 0.4545 | 0.13 | 1    | 0.18   | 0.4308 | 0.02   | 0.2419 | 0.05   | NA     | NA     | 0.5714 | 0.03 |    |
|         | Bfg124   |  |  |  |        | 0.3198 | 0.05 |        | 0.4545 | 0.13 | 1    | 0.18   | NA     | NA     | NA     | NA     | 0.3501 | 0      | 0.5714 | 0.03 |    |
| Xt7A    | Bfg203   |  |  |  | NA     | NA     |      | 1      | 0.02   | 1    | 0.18 | 0.4945 | 0.11   | 0.1371 | 0.16   | NA     | NA     | 0.2857 | 0.31   |      |    |
| Xt7A    | Bfg238   |  |  |  | NA     | NA     |      | 0.8333 | 0.47   | 1    | 0    | NA     |      |    |
| Xt7B    | Bfg060   |  |  |  |        | 0.1736 | 0.03 |        | 0.6364 | 0.13 | 1    | 0.02   | 0.4747 | 0.04   | 0.3695 | 0.05   | 0.1712 | 0.11   | 0.5714 | 0.03 |    |
|         | Bfg232   |  |  |  |        | 0.1736 | 0.03 |        | 0.6364 | 0.13 | 1    | 0.02   | 0.5    | 0.33   | 0.3359 | 0.02   | 0.1712 | 0.11   | 0.5714 | 0.03 |    |
|         | Bfg250   |  |  |  |        | 0.1736 | 0.03 |        | 0.6364 | 0.13 | 1    | 0.02   | 0.4747 | 0.04   | 0.3628 | 0.04   | 0.1712 | 0.11   | 0.5714 | 0.03 |    |
|         | Bfg218   |  |  |  |        | NA     | NA   |        | 0.6364 | 0.13 | 1    | 0.02   | 0.4747 | 0.04   | NA     | NA     | 0.1712 | 0.11   | NA     | NA   |    |
| Xt8B    | Bfg063   |  |  |  |        | NA     | NA   |        | 0.5455 | 0.09 | 1    | 0.18   | NA     | NA     | NA     | NA     | NA     | NA     | 0.5714 | 0.03 |    |
|         | Bfg048   |  |  |  |        | 0.0916 | 0.06 |        | NA     | NA   | 1    | 0.18   | 0.1451 | 0.38   | 0.3695 | 0.05   | NA     | NA     | 0.5714 | 0.03 |    |
| Xt9     | Bfg161   |  |  |  |        | 0.1646 | 0.1  |        | NA     | NA   | NA   | NA     | 0.022  | 0.56   | NA     | NA     | 0.3501 | 0      | NA     | NA   |    |
|         | Bfg097   |  |  |  |        | 0.1646 | 0.1  |        | 0.6364 | 0.13 | 1    | 0.18   | 0.0659 | 0.52   | 0.3695 | 0.05   | 0.3628 | 0      | 0.7143 | 0.63 |    |
|         | Bfg006   |  |  |  |        | 0.1646 | 0.1  |        | NA     | NA   | 1    | 0.44   | NA     | NA   |    |
| unknown | Bfg130   |  |  |  |        | NA     | NA   |        | 0.5455 | 0.09 | 1    | 1      | NA     | NA     | NA     | NA     | 0.3973 | 0.22   | NA     | NA   |    |
|         | Bfg051   |  |  |  |        | NA     | NA   |        | 0.5455 | 0.09 | 1    | 0.51   | 1      | 1      | 1      | 1      | 0.3695 | 0.05   | NA     | NA   |    |
| unknown | Bfg135-2 |  |  |  |        | NA     | NA   |        | NA     | NA   | NA   | NA     | NA     | NA     | NA     | 0.3359 | 0.02   | NA     | NA     | NA   | NA |
